# Supplementary material for: Time Gain Needed for In-Ambulance Telemedicine: Cost-Utility Model
Source: PubMed Central journal article supplement (PMC5722977; doi:10.2196/mhealth.8288), 2017-11-24
Supplement: mhealth_v5i11e175_app1.pdf [file mhealth_v5i11e175_app1.pdf]

*Multimedia Appendix 1 - Details on all parameters used to populate the standard-care model*

| Parameter                                           | Base-Case Value            | Calculation/ Assumption/ Source                                                                                                                                                                                        | Distribution           | Alpha               | Beta          |
|-----------------------------------------------------|----------------------------|------------------------------------------------------------------------------------------------------------------------------------------------------------------------------------------------------------------------|------------------------|---------------------|---------------|
| <i>Probabilities</i>                                |                            |                                                                                                                                                                                                                        |                        |                     |               |
| After Suspected Stroke                              |                            | UZ Brussel Stroke Registry                                                                                                                                                                                             |                        |                     |               |
| mimic / TIA / Isch / Haem                           | 0,22 / 0,05* / 0,66 / 0,07 | *Sheppard et al. 2016[1] – TIA's in UZ Brussel Stroke Registry equaled 20% - excess TIA's were transitioned to Isch group.                                                                                             | Dirichlet              | 217 / 48 / 664 / 72 | 1 / 1 / 1 / 1 |
| after Isch                                          |                            | *According to Vanacker et al. 2016[2] 10% of Isch stroke patients are eligible for EVT.                                                                                                                                |                        |                     |               |
| IVT / EVT / Cons                                    | 0,15 / 0,05* / 0,8         | 20% IVT+ EVT (UZ Brussel Stroke Registry). Assume 50% of eligible patients is treated under standard care.                                                                                                             | Dirichlet              | 98 / 35 / 530       | 1 / 1 / 1 / 1 |
| after Isch & IVT                                    |                            |                                                                                                                                                                                                                        |                        |                     |               |
| 0-90 min / 91-180 min / 181-270 min                 | 0,12 / 0,24 / 0,64         | OTT distributions from Lees et al. 2010[3]                                                                                                                                                                             | Dirichlet              | 10 / 19 / 50 / 34   | 1 / 1 / 1 / 1 |
| after Isch & EVT                                    |                            | Campbell et al. 2016[4]<br>Time between start IVT and onset EVT equals 68 min.<br>Equal distribution as after Isch & IVT + shift of 68 min.                                                                            |                        |                     |               |
| 0-180 min / 181-270 min / 271-360 min / 361-480 min | 0,16 / 0,21 / 0,41 / 0,23  | To apply time shift we assume patients are distributed equally in a time interval. A shift of 30 minutes in a time interval of 90 minutes, means that 1/3th (30min/90min) of patients within that time interval shift. | Dirichlet              | 3 / 4 / 7 / 4       | 1 / 1 / 1 / 1 |
| after Mimic                                         |                            |                                                                                                                                                                                                                        |                        |                     |               |
| Fav / Unfav / Death                                 | 0,78 / 0,04 / 0,17         | UZ Brussel Stroke Registry                                                                                                                                                                                             | Dirichlet              | 170 / 9 / 38        | 1 / 1 / 1 / 1 |
| after TIA                                           |                            |                                                                                                                                                                                                                        |                        |                     |               |
| Fav / Unfav / Death                                 | 0,82 / 0,14 / 0,04         | UZ Brussel Stroke Registry                                                                                                                                                                                             | Dirichlet              | 39 / 7 / 2          | 1 / 1 / 1 / 1 |
| after Isch & Cons                                   |                            |                                                                                                                                                                                                                        |                        |                     |               |
| Fav / Unfav / Death                                 | 0,48 / 0,40 / 0,12         | Wardlaw et al. 2012[5] – control group                                                                                                                                                                                 | Dirichlet              | 254 / 213 / 64      | 1 / 1 / 1 / 1 |
| after Isch & IVT &                                  |                            |                                                                                                                                                                                                                        |                        |                     |               |
| 0-90 min                                            | 0,7 / 0,18 / 0,12          | Lees et al. 2010[3]<br>Calculation of ARR for mRS 0-1 based on NNT (ARR=1/NTT)                                                                                                                                         | Dirichlet              | 8 / 2 / 1           | 1 / 1 / 1 / 1 |
| 91-180 min                                          | 0,59 / 0,29 / 0,12         | 0,22 / 0,11 / 0,07 / 0,04                                                                                                                                                                                              | Dirichlet              | 11 / 6 / 2          | 1 / 1 / 1 / 1 |
| 181-270 min                                         | 0,55 / 0,33 / 0,12         | Favourable outcome (mRS0-2) calculated based on probabilities in after Isch & Cons & Fav (0,48) + ARR. Assume that ARR for mRS0-1 equals ARR for mRS0-2.                                                               | Dirichlet              | 28 / 17 / 6         | 1 / 1 / 1 / 1 |
| Fav / Unfav / Death                                 |                            |                                                                                                                                                                                                                        |                        |                     |               |
| after Isch & EVT &                                  |                            |                                                                                                                                                                                                                        |                        |                     |               |
|                                                     | 0,78 / 0,1 / 0,12          | Fransen et al. 2016[6]<br>Calculation of ARR for mRS 0-2 based on ARD                                                                                                                                                  | Dirichlet<br>Dirichlet | 2 / 0,3 / 0,4       | 1 / 1 / 1 / 1 |

|                                            |                    |                                                                                                  |           |               |               |
|--------------------------------------------|--------------------|--------------------------------------------------------------------------------------------------|-----------|---------------|---------------|
| 0-181 min                                  | 0,70 / 0,18 / 0,12 | ARR = ARR                                                                                        | Dirichlet | 3 / 0,7 / 0,4 | 1 / 1 / 1 / 1 |
| 181-270 min                                | 0,59 / 0,29 / 0,12 | 0,30 / 0,22 / 0,11 / 0,03                                                                        | Dirichlet | 4 / 2 / 0,9   | 1 / 1 / 1 / 1 |
| 271-360 min                                | 0,51 / 0,29 / 0,12 | Favourable outcome (mRS0-2) calculated based on probability after Isch & Cons & Fav (0,48) + ARR |           | 2 / 1,5 / 0,5 | 1 / 1 / 1 / 1 |
| 361-480 min                                |                    |                                                                                                  |           |               |               |
| Fav / Unfav / Death                        |                    |                                                                                                  |           |               |               |
| After Heam Fav / Unfav / Death             | 0,44 / 0,44 / 0,12 | Anderson et al. 2013[7]<br>Control Group                                                         | Dirichlet | 13 / 12 / 3   | 1 / 1 / 1 / 1 |
| <i>Utilities</i>                           |                    |                                                                                                  |           |               |               |
| Utility in the favourable state (mRS0-2)   | 0,74               | Dorman et al.1997[8]                                                                             | Beta      | 103           | 36            |
| Utility in the unfavourable state (mRS3-5) | 0,38               | Dorman et al.1997[8]                                                                             | Beta      | 248           | 404           |
| Utility in the death state                 | 0                  |                                                                                                  |           |               |               |
| Utility in the recurrent state             | 0,34               | Morris et al.2011[9]                                                                             | Beta      | 263           | 511,8         |
| <i>Markov transitions</i>                  |                    |                                                                                                  |           |               |               |
| Mortality after stroke 70-74 years         | 0,05               |                                                                                                  | Beta      | 294           | 812           |
| Mortality after stroke 75-79 years         | 0,08               | Based on Belgian mortality statistics                                                            | Beta      | 288           | 742           |
| Mortality after stroke 80-84 years         | 0,14               | multiplied with 2,5 (multiplier for age specific mortality among                                 | Beta      | 277           | 630           |
| Mortality after stroke 85-89 years         | 0,26               | stroke patients)[10]                                                                             | Beta      | 261           | 49            |
| Mortality after stroke 90+ years           | 0,45               |                                                                                                  | Beta      | 222           | 277           |

ARR= Absolute Risk Reduction, NNT = number needed to treat, ARR = Absolute Risk Difference, rpb1 = rapid blood pressure lowering, Fav = favourable outcome (mRS 0-2), Unfav = unfavourable outcome (mRS 3-5), TIA = transient ischemic attack, Isch = ischemic stroke, Haem = haemorrhagic stroke, cons = conservative treatment, OTT = onset to treatment, IVT= intravenous administration of tissue Plasminogen Activator, EVT = endovascular treatment, min = minutes

1. Sheppard JP, Lindenmeyer A, Mellor RM, Greenfield S, Mant J, Quinn T, et al. Prevalence and predictors of hospital prealerting in acute stroke: a mixed methods study. *Emerg Med J.* 2016 Jul;33(7):482-8. PMID: 26949969. doi: 10.1136/emered-2014-204392.
2. Vanacker P, Lambrou D, Eskandari A, Mosimann PJ, Maghraoui A, Michel P. Eligibility and Predictors for Acute Revascularization Procedures in a Stroke Center. *Stroke; a journal of cerebral circulation.* 2016 Jul;47(7):1844-9. PMID: 27301945. doi: 10.1161/strokeaha.115.012577.
3. Lees KR, Bluhmki E, von Kummer R, Brott TG, Toni D, Grotta JC, et al. Time to treatment with intravenous alteplase and outcome in stroke: an updated pooled analysis of ECASS, ATLANTIS, NINDS, and EPITHET trials. *Lancet.* 2010 May 15;375(9727):1695-703. PMID: 20472172. doi: 10.1016/s0140-6736(10)60491-6.

4. Campbell BC, Hill MD, Rubiera M, Menon BK, Demchuk A, Donnan GA, et al. Safety and Efficacy of Solitaire Stent Thrombectomy: Individual Patient Data Meta-Analysis of Randomized Trials. *Stroke; a journal of cerebral circulation*. 2016 Mar;47(3):798-806. PMID: 26888532. doi: 10.1161/strokeaha.115.012360.
5. Wardlaw JM, Murray V, Berge E, del Zoppo G, Sandercock P, Lindley RL, et al. Recombinant tissue plasminogen activator for acute ischaemic stroke: an updated systematic review and meta-analysis. *Lancet*. 2012 Jun 23;379(9834):2364-72. PMID: 22632907. doi: 10.1016/s0140-6736(12)60738-7.
6. Fransen PS, Berkhemer OA, Lingsma HF, Beumer D, van den Berg LA, Yoo AJ, et al. Time to Reperfusion and Treatment Effect for Acute Ischemic Stroke: A Randomized Clinical Trial. *JAMA Neurol*. 2016 Feb 1;73(2):190-6. PMID: 26716735. doi: 10.1001/jamaneurol.2015.3886.
7. Anderson CS, Heeley E, Huang Y, Wang J, Stapf C, Delcourt C, et al. Rapid blood-pressure lowering in patients with acute intracerebral hemorrhage. *N Engl J Med*. 2013 Jun 20;368(25):2355-65. PMID: 23713578. doi: 10.1056/NEJMoa1214609.
8. Dorman PJ, Waddell F, Slattery J, Dennis M, Sandercock P. Is the EuroQol a valid measure of health-related quality of life after stroke? *Stroke; a journal of cerebral circulation*. 1997 Oct;28(10):1876-82. PMID: 9341688.
9. Morris S, Hunter R, Davie C, Thompson A, Walker H, Thomson N, et al. Cost-effectiveness analysis of the london stroke service. University College London Report London, UK: University College London; 2011:1-62
10. Sandercock P, Berge E, Dennis M, Forbes J, Hand P, Kwan J, et al. Cost-effectiveness of thrombolysis with recombinant tissue plasminogen activator for acute ischemic stroke assessed by a model based on UK NHS costs. *Stroke; a journal of cerebral circulation*. 2004 Jun;35(6):1490-7. PMID: 15105519. doi: 10.1161/01.str.0000126871.98801.6e.
