# Supplementary material for: Time Gain Needed for In-Ambulance Telemedicine: Cost-Utility Model
Source: PubMed Central journal article supplement (PMC5722977; doi:10.2196/mhealth.8288), 2017-11-24
Supplement: mhealth_v5i11e175_app2.pdf [file mhealth_v5i11e175_app2.pdf]

Multimedia Appendix 2: Details on the costs used in the model

| No | Parameter                                                  | Base-case value    | Calculation/ Assumption/ Source                                                 | Distribution | Alpha | Beta |
|----|------------------------------------------------------------|--------------------|---------------------------------------------------------------------------------|--------------|-------|------|
| 1  | After mimic                                                | \$5 351 (€4 027)   | Values taken from UZ Brussel Stroke                                             | Gamma        | 169   | 24   |
|    | <i>Favourable</i>                                          | \$33 333 (€25 082) | Registry linked with individual hospital                                        | Gamma        | 400   | 63   |
|    | <i>Unfavourable Death</i>                                  | \$12 517 (€9 419)  | claims data                                                                     | Gamma        | 29    | 319  |
| 2  | After TIA                                                  | \$7 042 (€5 299)   | Values taken from UZ Brussel Stroke                                             | Gamma        | 324   | 16   |
|    | <i>Favourable</i>                                          | \$20 660 (€15 546) | Registry linked with individual hospital                                        | Gamma        | 73    | 214  |
|    | <i>Unfavourable Death</i>                                  | \$8 265 (€6 219)   | claims data                                                                     | Gamma        | 24    | 255  |
| 3  | After Isch & Cons                                          | \$13 690 (€10 301) | Values taken from UZ Brussel Stroke                                             | Gamma        | 318   | 32   |
|    | <i>Favourable</i>                                          | \$39 435 (€29 673) | Registry linked with individual hospital                                        | Gamma        | 827   | 36   |
|    | <i>Unfavourable Death</i>                                  | \$19 409 (€14 604) | claims data                                                                     | Gamma        | 132   | 110  |
| 4  | After Isch & IVT                                           | \$18 797 (€14 144) | Values taken from Stroke UZ Brussel                                             | Gamma        | 86    | 164  |
|    | <i>Favourable</i>                                          | \$45 862 (€34 509) | Stroke Registry linked with individual                                          | Gamma        | 301   | 115  |
|    | <i>Unfavourable Death</i>                                  | \$18 311 (€13 778) | hospital claims data                                                            | Gamma        | 49    | 283  |
| 5  | After Isch & EVT                                           | \$24 823 (€18 678) | (4) + (6)                                                                       | Gamma        | 400   | 46   |
|    | <i>Favourable</i>                                          | \$53 197 (€40 028) |                                                                                 | Gamma        | 400   | 100  |
|    | <i>Unfavourable Death</i>                                  | \$24 606 (€18 515) |                                                                                 | Gamma        | 400   | 46   |
| 6  | Mean costs of Materials used in the operative room for EVT | \$6 025 (€4 534)   | Bing 2013 [1]                                                                   | NA           | NA    | NA   |
|    | <i>Favourable</i>                                          | \$7 334 (€5 519)   |                                                                                 | NA           | NA    | NA   |
|    | <i>Unfavourable Death</i>                                  | \$6 295 (€4 737)   |                                                                                 | NA           | NA    | NA   |
| 7  | Additional cost of IVT                                     | \$561 (€422)       | Cost of 50 ml Alteplase in Belgium – assume every patient is administered 50 ml | NA           | NA    | NA   |
| 8  | After Haem & Cons                                          | \$29 545 (€22 231) | Values taken from UZ Brussel Stroke                                             | Gamma        | 64    | 346  |
|    | <i>Favourable</i>                                          | \$48 003 (€36 120) | Registry l linked with individual hospital                                      | Gamma        | 329   | 110  |
|    | <i>Unfavourable Death</i>                                  | \$10 927 (€8 222)  | claims data                                                                     | Gamma        | 39    | 208  |

|    |                                                          |                    |                                                                                                                                                                                          |       |      |    |
|----|----------------------------------------------------------|--------------------|------------------------------------------------------------------------------------------------------------------------------------------------------------------------------------------|-------|------|----|
| 9  | Costs of one year cycle (Markov Model)                   |                    |                                                                                                                                                                                          |       |      |    |
|    | Favourable                                               | \$4 115 (€3 096)   | Health care utilization based on CERISE                                                                                                                                                  | Gamma | 400  | 8  |
|    | Unfavourable                                             | \$19 188 (€14 438) | database[2] and UZ Brussel Stroke Registry                                                                                                                                               | Gamma | 400  | 36 |
|    |                                                          |                    | More information in Multimedia Appendix 3                                                                                                                                                |       |      |    |
| 10 | Costs of Hospitalization recurrent stroke (Markov Model) | \$8 789 (€6 613)   | Values taken from UZ Brussel Stroke Registry linked with individual hospital claims data                                                                                                 | Gamma | 1913 | 4  |
| 11 | After Isch & IVT & Inatel                                |                    | Weighted average between the cost for IVT (4) and the cost for conservative care (3) for each new patient receiving IVT summed with the additional cost of IVT (7) for each new patient. |       |      |    |
|    | <i>Favourable</i>                                        | \$16 812 (€12 650) |                                                                                                                                                                                          | Gamma | 400  | 32 |
|    | <i>Unfavourable</i>                                      | \$43 558 (€32 775) |                                                                                                                                                                                          | Gamma | 400  | 82 |
|    | <i>Death</i>                                             | \$19 010 (€14 304) |                                                                                                                                                                                          | Gamma | 400  | 36 |
| 12 | After Isch & EVT & Inatel                                |                    | Weighted average between the cost for EVT (5) and the cost for conservative care (3) for each new patient receiving EVT summed with the additional cost of EVT (6) for each new patient. |       |      |    |
|    | <i>Favourable</i>                                        | \$21 984 (€16 542) |                                                                                                                                                                                          | Gamma | 400  | 32 |
|    | <i>Unfavourable</i>                                      | \$50 131 (€37 721) |                                                                                                                                                                                          | Gamma | 400  | 82 |
|    | <i>Death</i>                                             | \$24 967 (€18 786) |                                                                                                                                                                                          | Gamma | 400  | 36 |

SE = Stander Error, rpbl = rapid blood pressure lowering, Favourable = favourable outcome (mRS0-2), Unfavourable = unfavourable outcome (mRS3-5), TIA = transient ischemic attack, Isch = ischemic stroke, Haem = haemorrhagic stroke, cons = conservative treatment, OTT = onset to treatment, IVT= intravenous administration of tissue Plasminogen Activator, EVT = endovascular treatment, NA= Non Applicable, Inatel = In-ambulance telemedicine

1. Bing F, Jacquin G, Poppe A, Roy D, Raymond J, Weill A. The cost of materials for intra-arterial thrombectomy. *Interv Neuroradiol.* 2013 Mar;19(1):83-6. PMID: 23472729.
2. Putman K, De Wit L, Schupp W, Baert I, Brinkmann N, Dejaeger E, et al. Variations in follow-up services after inpatient stroke rehabilitation: a multicentre study. *Journal of rehabilitation medicine.* 2009 Jul;41(8):646-53. PMID: 19565159. doi: 10.2340/16501977-0385.
