# Supplementary material for: Time Gain Needed for In-Ambulance Telemedicine: Cost-Utility Model
Source: PubMed Central journal article supplement (PMC5722977; doi:10.2196/mhealth.8288), 2017-11-24
Supplement: mhealth_v5i11e175_app3.pdf [file mhealth_v5i11e175_app3.pdf]

*Multimedia Appendix 3: Details on health care utilization costs based on CERISE database[1] and UZ Brussel Stroke Registry– 1 year post-stroke costs*

|                                | Unit cost<br>(1)            | Mean absolute<br>Frequency<br>mRS 0-2<br>(2) | Relative<br>Frequency<br>mRS0-2<br>(3) | Mean absolute<br>Frequency<br>mRS 3-5<br>(4) | Relative<br>Frequency<br>mRS 3-5<br>(5) | <b>Total Cost<br/>mRS 0-2</b> | <b>Total Cost<br/>mRS 3-5</b> |
|--------------------------------|-----------------------------|----------------------------------------------|----------------------------------------|----------------------------------------------|-----------------------------------------|-------------------------------|-------------------------------|
| GP visitis                     | € 24,48                     | 5,76                                         | 0,84                                   | 6,8                                          | 0,91                                    | (1)*(2)*(3) =<br>€ 236,38     | (1)*(4)*(5) =<br>€ 304,15     |
| Specialist visits              | € 53,76                     | 2,68                                         | 0,71                                   | 2,5                                          | 0,91                                    | € 204,11                      | € 241                         |
| Physiotherapy                  | € 22,26                     | 23,93                                        | 0,73                                   | 26,8                                         | 0,67                                    | € 778,86                      | € 794,61                      |
| Speech therapy                 | € 22,05                     | 14,75                                        | 0,22                                   | 20,0                                         | 0,27                                    | € 139,89                      | € 240,55                      |
| Rehabilitation<br>center costs | € 18 250<br>(one year cost) | 1                                            | 0,016*                                 | 1                                            | 0,5*                                    | € 292                         | € 9125                        |
| Home nursing<br>costs          | € 12 045<br>(one year cost) | 1                                            | 0,12*                                  | 1                                            | 0,31*                                   | € 1445,4                      | € 3734                        |
| <b>Total Costs</b>             |                             |                                              |                                        |                                              |                                         | <b>€ 3 096</b>                | <b>€ 14 438</b>               |

Unit costs taken from Belgian RIZIV codes (payer + provider cost), all other data taken from CERISE database, \*taken from UZ Brussel Stroke Registry  
RIZIV = Rijksinstituut voor ziekte-en invaliditeitsverzekering, GP = General Practitioner,  
Rounding of numbers reported in this table leads to a slightly different calculation then reported in Total Costs in the table

1. Putman K, De Wit L, Schupp W, Baert I, Brinkmann N, Dejaeger E, et al. Variations in follow-up services after inpatient stroke rehabilitation: a multicentre study. *Journal of rehabilitation medicine*. 2009 Jul;41(8):646-53. PMID: 19565159. doi: 10.2340/16501977-0385.
