# Supplementary material for: Time Gain Needed for In-Ambulance Telemedicine: Cost-Utility Model
Source: PubMed Central journal article supplement (PMC5722977; doi:10.2196/mhealth.8288), 2017-11-24
Supplement: mhealth_v5i11e175_app7.pdf [file mhealth_v5i11e175_app7.pdf]

Multimedia Appendix 7. Tornado input probabilities – incremental QALY per patient

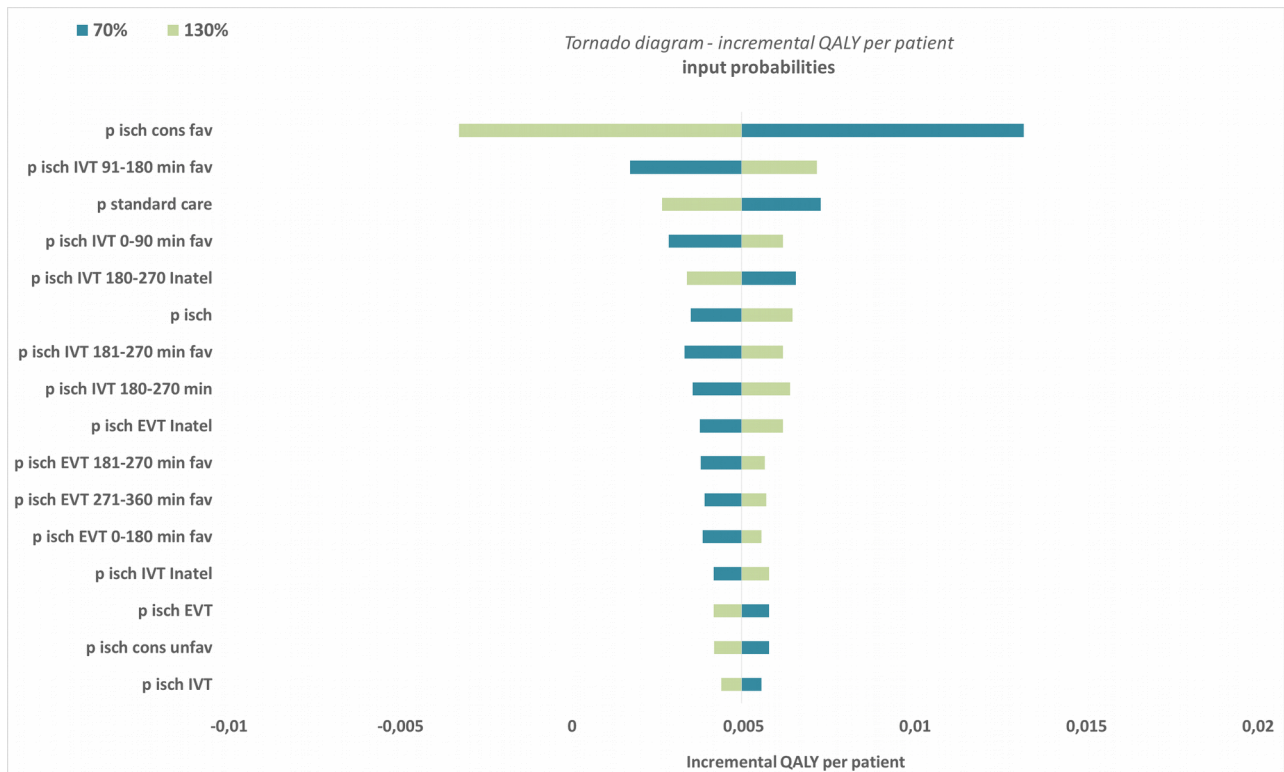

fav = favourable outcome (mRS 0-2), unfav = unfavourable outcome (mRS 3-5), isch = ischemic stroke, cons = conservative treatment, IVT= intravenous administration of tissue Plasminogen Activator, EVT = endovascular treatment, Inatel = In-ambulance Telemedicine, min= minutes, p = probability, standard = standard care (as a proportion of total patients vs. in-ambulance telemedicine)

Input parameters that lead to an effect of less than 0,001 QALY dispersion per patient not shown here.

Model for 12 minutes time gain with in-ambulance telemedicine.
