# Supplementary material for: Time Gain Needed for In-Ambulance Telemedicine: Cost-Utility Model
Source: PubMed Central journal article supplement (PMC5722977; doi:10.2196/mhealth.8288), 2017-11-24
Supplement: mhealth_v5i11e175_app8.pdf [file mhealth_v5i11e175_app8.pdf]

Multimedia Appendix 8. Tornado input costs, utilities & other parameters – incremental cost per patient

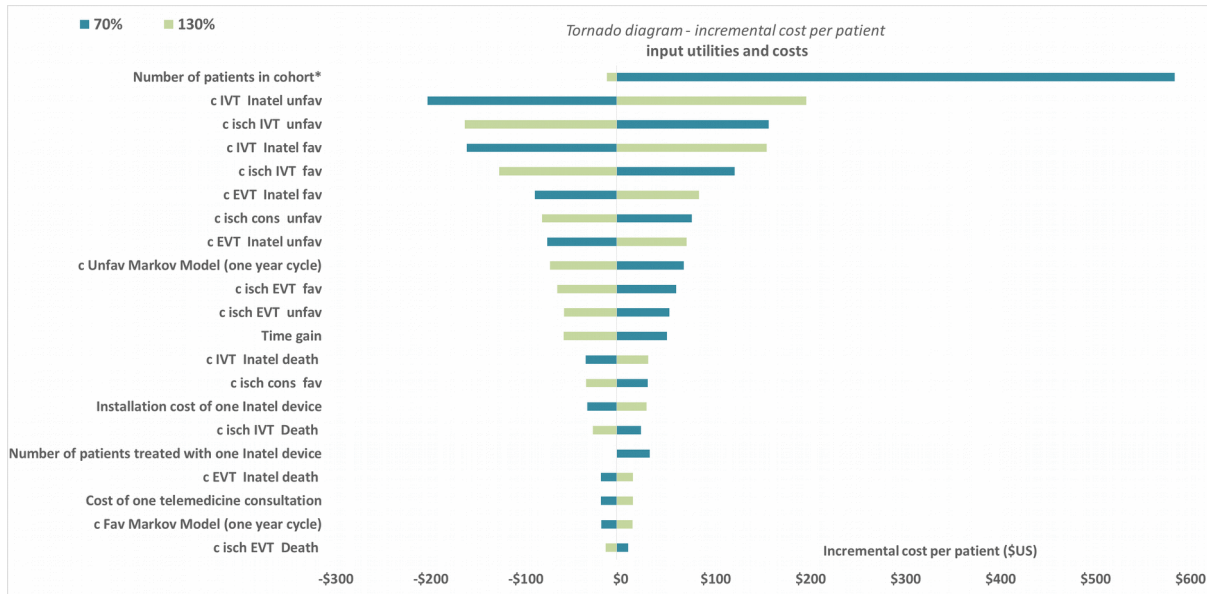

rpbl = rapid blood pressure lowering, Favourable = favourable outcome (mRS0-2),  
 Unfavourable = unfavourable outcome, fav = favourable outcome (mRS 0-2),  
 unfav = unfavourable outcome (mRS 3-5), isch = ischemic stroke, haem = haemorrhagic stroke,  
 cons = conservative treatment, IVT= intravenous administration of tissue Plasminogen Activator,  
 EVT = endovascular treatment, Inatel = In-ambulance Telemedicine, y = year, min= minutes, c = cost

\*Number of patients in cohort varied to 50 (blue) & 10 000 (green)

Input parameters that lead to an effect of less than \$20 dispersion per patient not shown here.

Model for 12 minutes time gain with in-ambulance telemedicine.
