# Supplementary material for: Time Gain Needed for In-Ambulance Telemedicine: Cost-Utility Model
Source: PubMed Central journal article supplement (PMC5722977; doi:10.2196/mhealth.8288), 2017-11-24
Supplement: mhealth_v5i11e175_app9.pdf [file mhealth_v5i11e175_app9.pdf]

Multimedia Appendix 9. Tornado input costs, utilities & other parameters – incremental QALY per patient

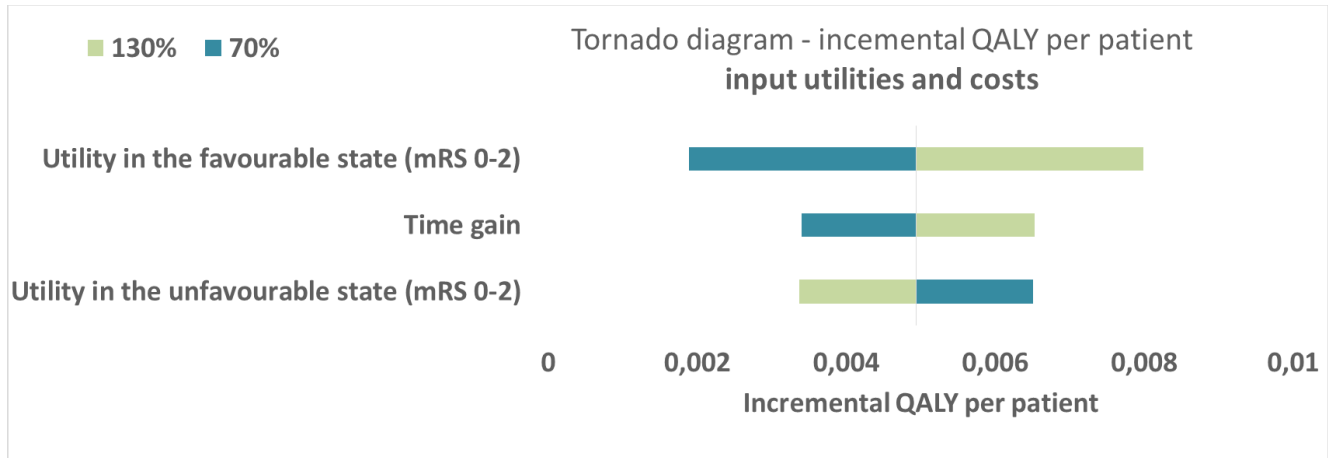

Input parameters that lead to an effect of less than 0,001 QALY dispersion per patient not shown here.

Model for 12 minutes time gain with in-ambulance telemedicine.
